# Supplementary material for: Preclinical Head and Neck Squamous Cell Carcinoma Models for Combined Targeted Therapy Approaches
Source: MDPI journal article supplement (doi:10.3390/cancers14102484), 2022-05-18
Supplement: s1 [file s1]

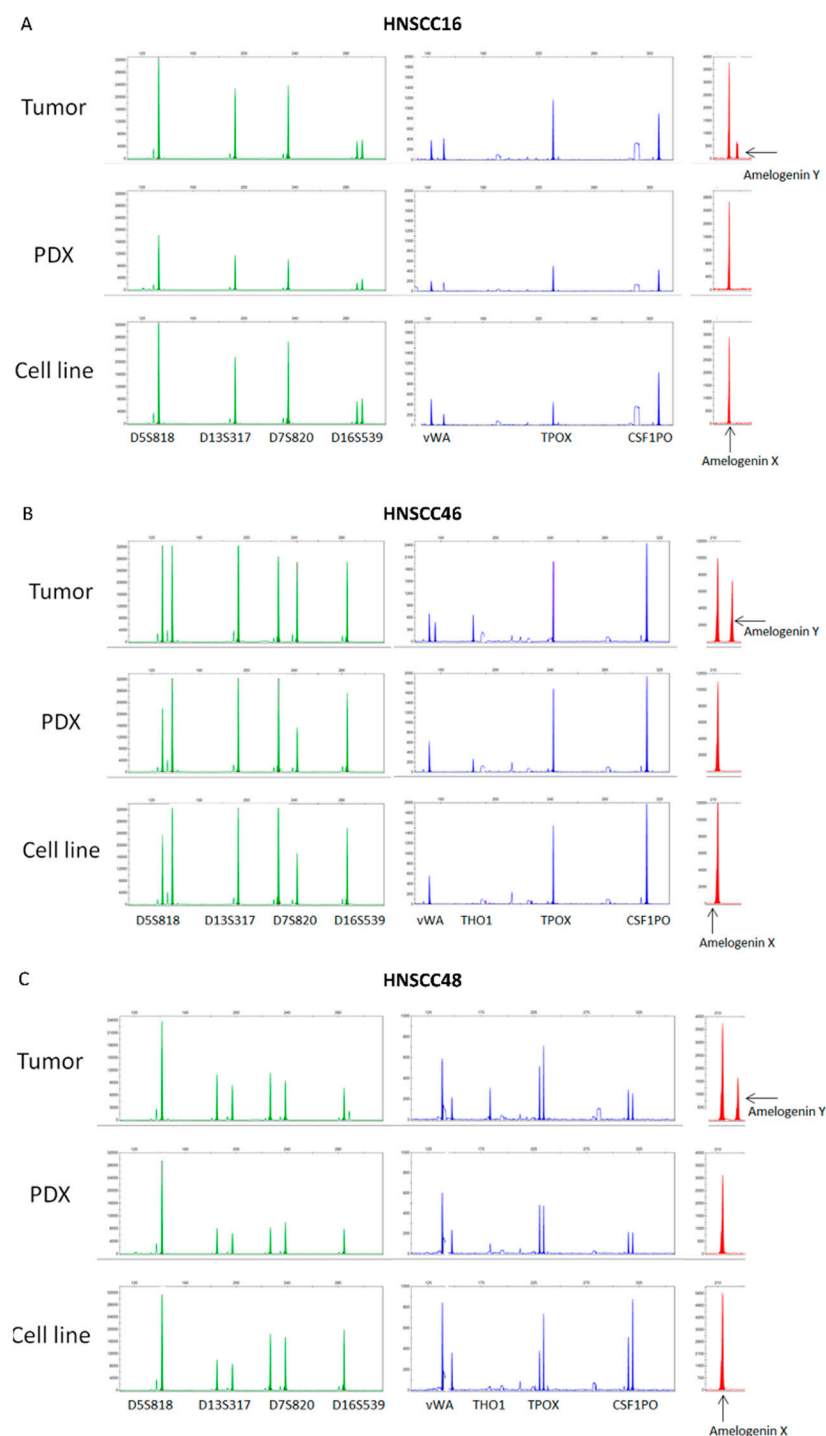

**Figure S1.** Fingerprint PCR of patients' tumor, PDX and cell line of (A) HNSCC16 (B) HNSCC46 and (C) HNSCC48 to confirm identity with the patient. Used are the following loci: D5S818, D13S317, D7S820, D16S539, vWA THO1, TPOX, CSF1PO and Amelogenin X and Y. HEX (green), FAM (blue), TAMRA (red).

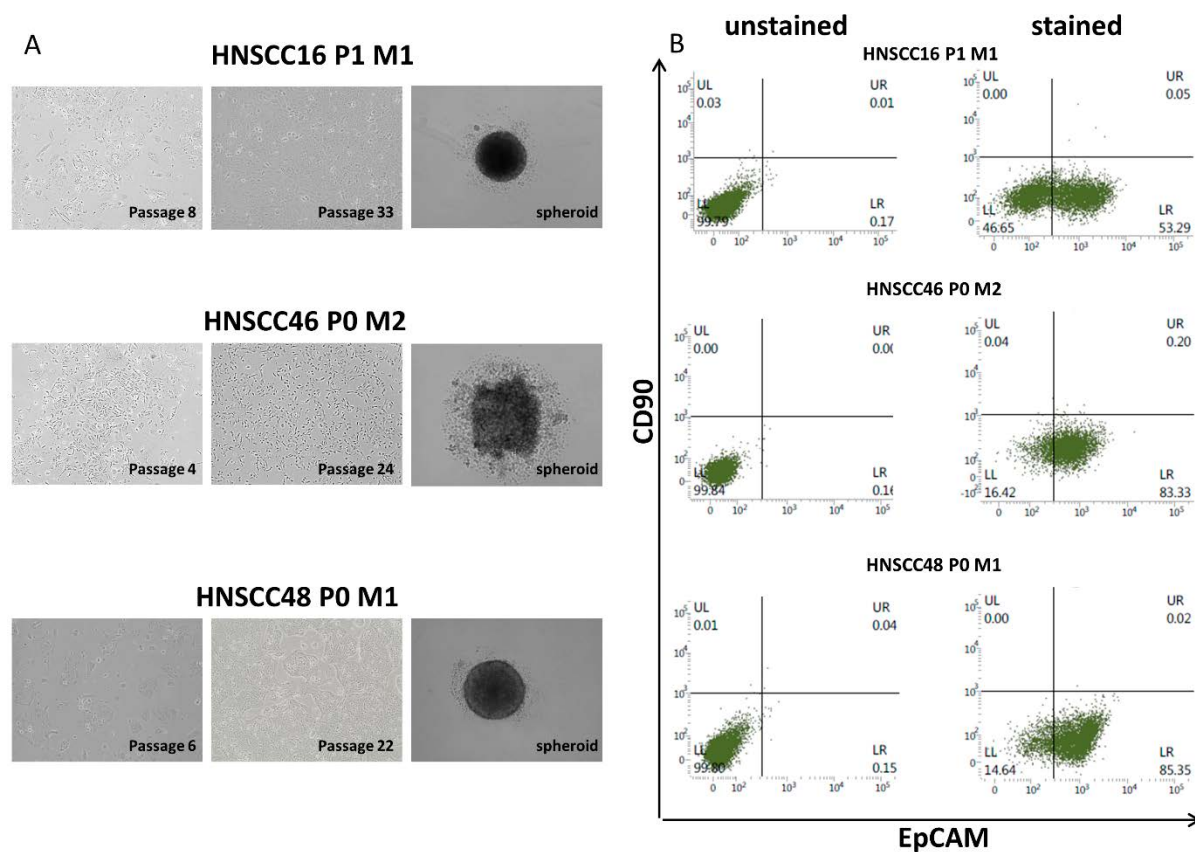

**Figure S2.** Establishment of xenograft-derived cell lines. (A) Light microscopy images of HNSCC16 P1 M1, HNSCC46 P0 M2, and HNSCC48 P0 M1 in early passages (passage 4–8), late passages (passage 22–33), and spheroid formation after 5 days in culture. Original magnification 100x. (B) FACS analysis confirms absence of fibroblasts. Cells were stained with CD90 (fibroblast marker) and EpCAM (CD326, epithelial tissue marker).

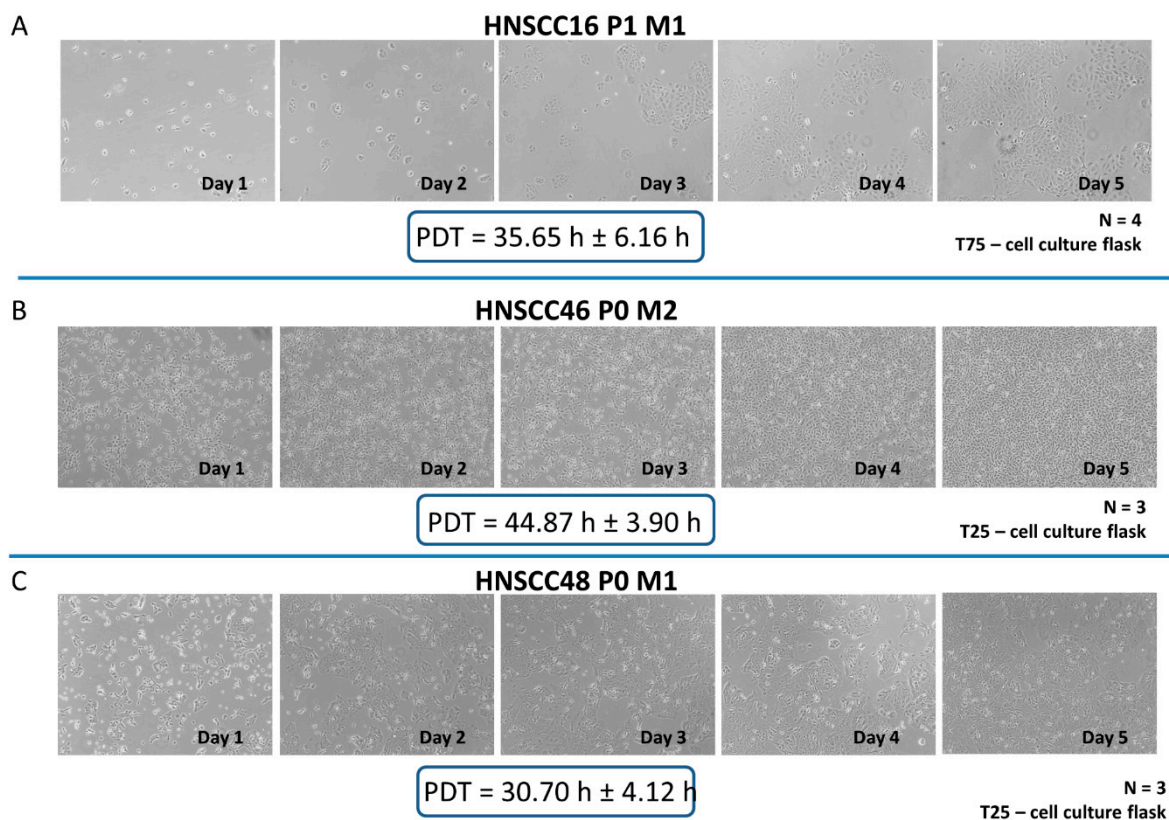

**Figure S3.** Population doubling times of (A) HNSCC16 M1 P1, (B) HNSCC46 P0 M2, and (C) HNSCC48 P0 M1. Shown are representative light microscopy images of the cells on 5 consecutive days after seeding a defined amount of cells. Original magnification 100x.

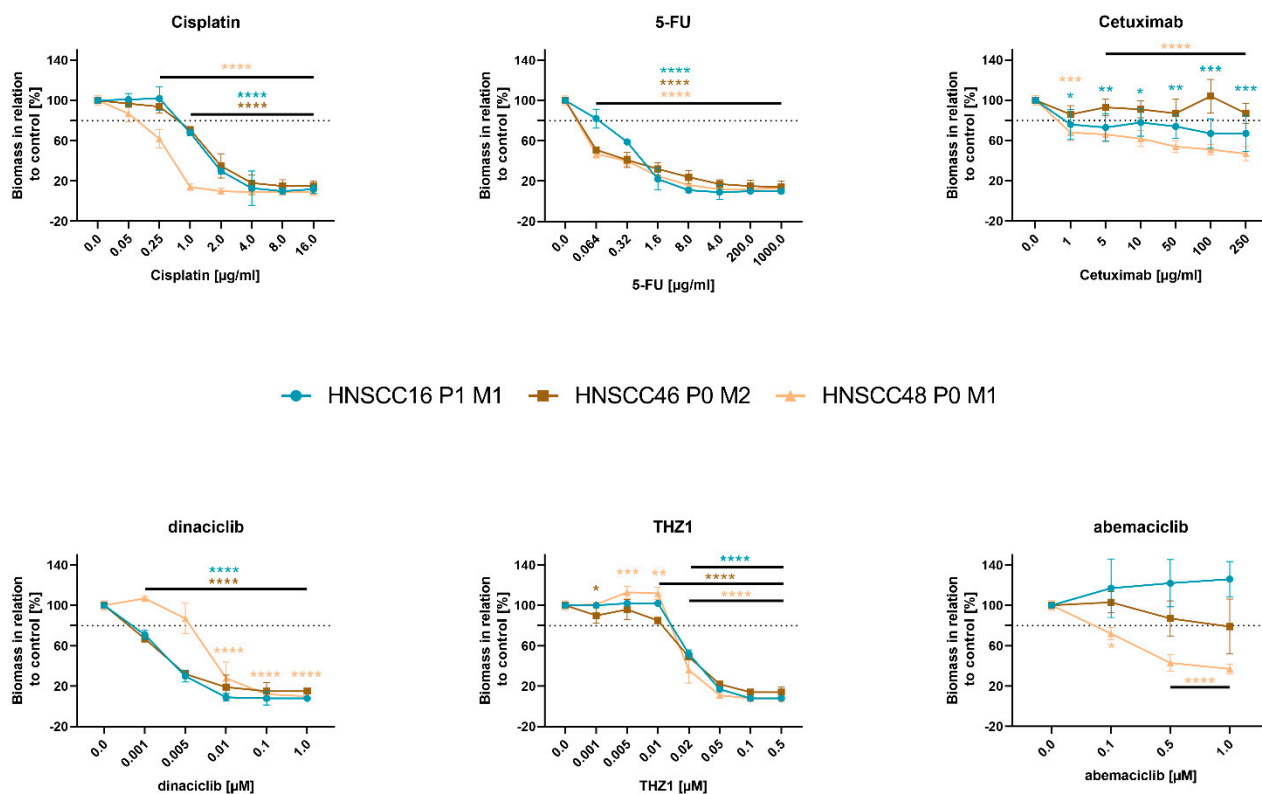

**Figure S4.** Dose–response curve analysis. Tumor cells were treated for  $2 \times 72$  h with the different test substances in varying concentrations ranging between 0.048  $\mu\text{g/mL}$ –1 mg/mL for approved drugs (Cisplatin, 5-FU, and Cetuximab) and 1 nM–1  $\mu\text{M}$  for targeted substances (dinaciclib, abemaciclib, and THZ1). Based on the dose–response curves  $\text{IC}_{50}$  was calculated as outlined in Table 3. \*  $p < 0.05$ ; \*\*  $p < 0.01$ ; \*\*\*  $p < 0.001$ ; \*\*\*\*  $p < 0.0001$  vs. control (100%). Two-way ANOVA.
